# Supplementary material for: Korean Medicine Clinical Practice Guideline Update for Temporomandibular Disorders: An Evidence-Based Approach
Source: MDPI journal article supplement (doi:10.3390/healthcare11162364), 2023-08-21
Supplement: s1 [file s1]

## Evidence Table

Eq. (E.1) [Q1] Acupuncture Group VS Inactive Control Group

| No. | Study ID                | Study design | Country (period) | Intervention (n) | Comparison (n)    | Disease of participants (Age : Mean±S.D)                           | Number of Participants | Acupoints                               | Session or Treatment period   | Relevant outcomes                             | Adverse events |
|-----|-------------------------|--------------|------------------|------------------|-------------------|--------------------------------------------------------------------|------------------------|-----------------------------------------|-------------------------------|-----------------------------------------------|----------------|
| 1   | Diracoglu et al. (2012) | RCT          | Turkey (NR)      | Dry needling     | Sham dry needling | Temporomandibular myofascial pain (IG: 33.00±12.70 CG: 35.88±9.60) | IG: 26<br>CG: 26       | TrPs in masseter and temporalis muscles | 3 times with 7-day intervals  | 1) PPT<br>2) VAS<br>3) unassisted jaw opening | NR             |
| 2   | Goddard et al. (2002)   | RCT          | USA (NR)         | Acupuncture      | Sham acupuncture  | Myofascial pain (IG: 35.49±10.63 CG: 34.53±6.78)                   | IG: 10<br>CG: 8        | LI4, ST6                                | One time                      | VAS                                           | NR             |
| 3   | Itoh et al. (2012)      | RCT          | Japan (NR)       | TrP Acupuncture  | Sham acupuncture  | Chronic TMJ myofascial pain (IG: 21.7±2.1 CG: 21.4±1.4)            | IG: 8<br>CG: 8         | Myofascial TrPs                         | Total 5 sessions, Once a week | 1) VAS<br>2) MMO                              | NR             |

| No. | Study ID             | Study design | Country (period)          | Intervention (n) | Comparison (n)   | Disease of participants (Age : Mean±S.D)                                                                   | Number of Participants | Acupoints                                                                                                                                                                          | Session or Treatment period                                                                                 | Relevant outcomes                                                      | Adverse events |
|-----|----------------------|--------------|---------------------------|------------------|------------------|------------------------------------------------------------------------------------------------------------|------------------------|------------------------------------------------------------------------------------------------------------------------------------------------------------------------------------|-------------------------------------------------------------------------------------------------------------|------------------------------------------------------------------------|----------------|
| 4   | Schmid-Schwap (2006) | RCT          | Austria (11/2001–06/2003) | Acupuncture      | Sham acupuncture | females with TMJ pain and tenderness on pressure of the craniomandibular musculature (IG: 35±14 CG: 40±14) | IG: 11<br>CG: 12       | Intraoral: Maxilla retromolar, Mandible retromolar, Maxilla – vestibulum and Mandible – vestibulum; extraoral: large intestine 4, small intestine 2 and 3 (hand), ear and sternum. | One time                                                                                                    | 1) VAS<br>2) MMO                                                       | None           |
| 5   | Smith (2007)         | RCT          | UK (06–07/2003)           | Acupuncture      | Sham acupuncture | TMJ MP for at least 6 months (IG: 38.3±13.39 CG: 43.2±4.04)                                                | IG: 15<br>CG: 12       | ST7                                                                                                                                                                                | 6 sessions for 3 weeks. all outcome measures 3 days and then 7 days following the final acupuncture session | 1) VAS<br>Functional impairment<br>Pain intensity<br>Pain distribution | NR             |

| No. | Study ID           | Study design | Country (period) | Intervention (n) | Comparison (n)   | Disease of participants (Age : Mean±S.D)                         | Number of Participants | Acupoints | Session or Treatment period | Relevant outcomes                                                                                                    | Adverse events |
|-----|--------------------|--------------|------------------|------------------|------------------|------------------------------------------------------------------|------------------------|-----------|-----------------------------|----------------------------------------------------------------------------------------------------------------------|----------------|
| 6   | Shen et al. (2007) | RCT          | USA (NR)         | Acupuncture      | Sham acupuncture | Chronic MPS of masticatory muscles (IG: 45.2±12.3 CG: 41.8±14.9) | IG: 9<br>CG: 6         | LI4       | One time                    | 1) NRS<br>Facial pain<br>Neck pain<br>Headache<br>2) VAS<br>Mechanical pressure pain                                 | NR             |
| 7   | Shen et al. (2009) | RCT          | USA (NR)         | Acupuncture      | Sham acupuncture | MPS of jaw muscles (IG: 36.94±13.82 CG: 44.83±11.61)             | IG: 16<br>CG: 12       | LI4       | One time                    | 1) NRS<br>jaw pain<br>jaw/face tightness<br>headache<br>neck pain<br>2) VAS<br>pain tolerance of the masseter muscle | NR             |

| No. | Study ID           | Study design | Country (period)          | Intervention (n) | Comparison (n)   | Disease of participants (Age : Mean±S.D)           | Number of Participants | Acupoints                                                                                                                                                                                 | Session or Treatment period | Relevant outcomes                                   | Adverse events |
|-----|--------------------|--------------|---------------------------|------------------|------------------|----------------------------------------------------|------------------------|-------------------------------------------------------------------------------------------------------------------------------------------------------------------------------------------|-----------------------------|-----------------------------------------------------|----------------|
| 8   | Simma (2009)       | RCT          | Austria (02/2002-07/2003) | Acupuncture      | placebo laser    | dysfunction and pain in TMJ(NR)                    | IG: 11<br>CG: 12       | Upper jaw retromolar<br>Lower jaw retromolar<br>Upper jaw vestibulum<br>Lower jaw vestibulum<br>Large intestine 4<br>Small intestine 3,<br>2 Auricle<br>Sternum<br>Adler<br>Langer points | One time                    | 1) Pain rating by palpation of 14 muscles<br>2) VAS | NR             |
| 9   | Shen et al. (2009) | RCT          | USA (NR)                  | Acupuncture      | Sham acupuncture | MPS of jaw muscles (IG: 37.33±12.97 CG: 44.5±13.7) | IG: 6<br>CG: 6         | LI4                                                                                                                                                                                       | One time                    | fMRI                                                | NR             |

| No. | Study ID            | Study design | Country (period)         | Intervention (n)                                                        | Comparison (n)   | Disease of participants (Age : Mean±S.D)                                                                             | Number of Participants       | Acupoints                                                                          | Session or Treatment period        | Relevant outcomes                                                                                                       | Adverse events |
|-----|---------------------|--------------|--------------------------|-------------------------------------------------------------------------|------------------|----------------------------------------------------------------------------------------------------------------------|------------------------------|------------------------------------------------------------------------------------|------------------------------------|-------------------------------------------------------------------------------------------------------------------------|----------------|
| 10  | Zotelli (2017)      | RCT          | BRAZIL (07/2015-06/2016) | Acupuncture                                                             | Sham acupuncture | temporomandibular disorders (TMD) (IG: 38±8.7 CG: 35.1±8.5)                                                          | IG: 23<br>CG: 20             | ST6, ST7, SI18, GV20, GB20, BL10, LI4                                              | Once a week, 4 sessions            | 1) MMO<br>Unassisted<br>painless<br>mouth opening<br>Unassisted<br>mouth opening<br>Assisted<br>mouth opening<br>2) VAS | NR             |
| 11  | Lopez-Martos (2018) | RCT          | SPAIN (06/2015-06.2016)  | 1) PNE (percutaneous needle electrolysis)<br>2) DDN (deep dry needling) | Sham acupuncture | myogenic pain in the temporo-mandibular area of at least 6 months (IG1: 38.5 (18-57) IG2: 36 (19-58) CG: 42 (25-62)) | IG1: 20<br>IG2: 20<br>CG: 20 | IG1 :<br>transcutaneous<br>puncture in<br>the LPM<br><br>IG2 : TPs<br><br>CG : LPM | One session per a week for 3 weeks | 1) VAS<br>PNE vs DDN<br>PNE vs SNP<br>DDN vs SNP                                                                        | NR             |

| No. | Study ID                 | Study design | Country (period)   | Intervention (n) | Comparison (n)                   | Disease of participants (Age : Mean±S.D)                                     | Number of Participants       | Acupoints                                                              | Session or Treatment period                                                   | Relevant outcomes                                                                                                                                                                                   | Adverse events |
|-----|--------------------------|--------------|--------------------|------------------|----------------------------------|------------------------------------------------------------------------------|------------------------------|------------------------------------------------------------------------|-------------------------------------------------------------------------------|-----------------------------------------------------------------------------------------------------------------------------------------------------------------------------------------------------|----------------|
| 11  | Fernández-Carnero (2010) | RCT          | SPAIN (01-07/2008) | Dry needling     | Sham dry needling                | myofascial pain according to the Research Diagnostic Criteria for TMD (25±6) | IG: 6<br>CG: 6               | TrP on the masseter muscle (most painful point on the masseter muscle) | 2 sessions at least 7 days apart (assigned in a random fashion at each visit) | 1) PPT masseter muscle mandibular condyle<br>2) MMO                                                                                                                                                 | NR             |
| 12  | Johansson (2006)         | RCT          | SWEDEN (NR)        | Acupuncture      | CG1: Splint<br>CG2: No treatment | CMD (NR)                                                                     | IG: 15<br>CG1: 15<br>CG2: 15 | Three to seven needles were used locally and LI4                       | 6 sessions for IG                                                             | 1) VAS<br>IG vs CG1<br>IG vs CG2<br>CG1 vs CG2<br>2) SDS<br>IG vs CG1<br>IG vs CG2<br>CG1 vs CG2<br>3) ER<br>IG vs CG1<br>IG vs CG2<br>CG1 vs CG2<br>4) CDS<br>IG vs CG1<br>IG vs CG2<br>CG1 vs CG2 | NR             |

| No. | Study ID        | Study design | Country (period) | Intervention (n)                                                                        | Comparison (n)                                          | Disease of participants (Age : Mean±S.D)                                     | Number of Participants       | Acupoints                      | Session or Treatment period                                                            | Relevant outcomes                                                           | Adverse events |
|-----|-----------------|--------------|------------------|-----------------------------------------------------------------------------------------|---------------------------------------------------------|------------------------------------------------------------------------------|------------------------------|--------------------------------|----------------------------------------------------------------------------------------|-----------------------------------------------------------------------------|----------------|
| 13  | McMillan (1997) | RCT          | UK (NR)          | IG1: Procain + simulated dry needling<br>IG2: Dry needling + simulated local anesthetic | CG: simulated dry needling + simulated local anesthetic | TMD with MPS (23–53)                                                         | IG1: 10<br>IG2: 10<br>CG: 10 | active TP in the masseter      | 3 occasions 1 week apart                                                               | 1) PPT masseter muscle temporalis muscle<br>2) VAS Intensity Unpleasantness | NR             |
| 14  | List (1993)     | RCT          | SWEDEN (NR)      | IG1: Acupuncture<br>IG2: Splint                                                         | CG: No treatment                                        | cramomandibular disorders and a history of pain of at least 6 months (22–69) | IG1: 20<br>IG2: 20<br>CG: 15 | Ex2, ST7, ST6, GB20, LI4, ST36 | treatment period lasted between 6 and 8 weeks, 1 session was given at 1–week intervals | 1) PPT<br>2) CDS<br>2) VAS                                                  | NR             |

Eq. (E.2) [Q2] Acupuncture Group VS usual Conservative Treatment Group

| No. | Study ID | Study design | Country (period) | Intervention (n) | Comparison (n) | Disease of participants (Age : Mean±S.D) | Number of Participants | Acupoints | Session or Treatment period | Relevant outcomes | Adverse events |
|-----|----------|--------------|------------------|------------------|----------------|------------------------------------------|------------------------|-----------|-----------------------------|-------------------|----------------|
|-----|----------|--------------|------------------|------------------|----------------|------------------------------------------|------------------------|-----------|-----------------------------|-------------------|----------------|

| No. | Study ID                     | Study design | Country (period) | Intervention (n)                                                                        | Comparison (n)                                          | Disease of participants (Age : Mean±S.D)                                                                      | Number of Participants       | Acupoints                                       | Session or Treatment period  | Relevant outcomes                                                                        | Adverse events |
|-----|------------------------------|--------------|------------------|-----------------------------------------------------------------------------------------|---------------------------------------------------------|---------------------------------------------------------------------------------------------------------------|------------------------------|-------------------------------------------------|------------------------------|------------------------------------------------------------------------------------------|----------------|
| 1   | McMillan (1997)              | RCT          | UK (NR)          | IG1: Procain + simulated dry needling<br>IG2: Dry needling + simulated local anesthetic | CG: simulated dry needling + simulated local anesthetic | TMD with MPS (23–53)                                                                                          | IG1: 10<br>IG2: 10<br>CG: 10 | active TP in the masseter                       | 3 occasions<br>1 week apart  | 1) PPT masseter muscle<br>temporalis muscle<br>2) VAS Intensity<br>Unpleasantness        | NR             |
| 2   | Gonzalez–Perez et al. (2015) | RCT          | Spain (NR)       | deep dry needling (DDN) of trigger points (TPs)                                         | methocarbamol/paracetamol medication.                   | temporo–mandibular myofascial pain located in the lateral pterygoid muscle (IG: 34.3 ± 13.8, CG: 35.5 ± 11.2) | IG: 24<br>CG: 24             | lateral pterygoid muscle (LPM)                  | 3 times with 7–day intervals | IG: once per week for 3 weeks<br>CG: dose of two tablets every six hours for three weeks | NR             |
| 3   | Dai et al. (1996)            | RCT          | China (NR)       | Warm needling                                                                           | TDP                                                     | Temporomandibular joint syndrome (NR)                                                                         | IG: 48<br>CG: 46             | Ashipoint, ST6, SI19 (affected), LI4(bilateral) | 10 sessions, 간격 3–5일         | Effective rate                                                                           |                |



| No. | Study ID            | Study design | Country (period)        | Intervention (n)               | Comparison (n)        | Disease of participants (Age : Mean±S.D)                                                       | Number of Participants | Acupoints                                                    | Session or Treatment period   | Relevant outcomes                         | Adverse events |
|-----|---------------------|--------------|-------------------------|--------------------------------|-----------------------|------------------------------------------------------------------------------------------------|------------------------|--------------------------------------------------------------|-------------------------------|-------------------------------------------|----------------|
| 4   | Luo et al. (2001)   | RCT          | China (NR)              | Acupuncture                    | very high frequency   | Temporomandibular joint syndrome (NR)                                                          | IG: 21<br>CG: 20       | first group: GB2, ST7, GB20<br>second group: SI19, TE17, LI4 | 10 sessions, 5 days intervals | Effective rate                            |                |
| 5   | Xu et al. (2010)    | RCT          | China (2008/07–2009/06) | Surrounding Electroacupuncture | local ultrashort wave | temporomandibular joint disturbance syndrome (IG: 35±5, CG: 34±4)                              | IG: 30<br>CG: 30       | Ashipoint                                                    | daily, 10 sessions            | McGill pain questionnaire (VAS, PRI, PPI) |                |
| 6   | Zhong et al. (2007) | RCT          | China (2005/12–2007/01) | Warm needling                  | ultrasound            | temporomandibular joint disturbance syndrome (temporomandibular disorder) (IG: 35±5, CG: 34±4) | IG: 60<br>CG: 60       | ST6, ST7                                                     | daily, 10 sessions            | efficacy rate                             |                |

| No. | Study ID            | Study design | Country (period)        | Intervention (n)                          | Comparison (n)                                     | Disease of participants (Age : Mean±S.D)                                                                                                           | Number of Participants        | Acupoints                      | Session or Treatment period | Relevant outcomes         | Adverse events |
|-----|---------------------|--------------|-------------------------|-------------------------------------------|----------------------------------------------------|----------------------------------------------------------------------------------------------------------------------------------------------------|-------------------------------|--------------------------------|-----------------------------|---------------------------|----------------|
| 7   | Huang et al. (2003) | RCT          | China (NR)              | IG : Acupuncture + diclofenac magma + TDP | CG1 : Computer pulse massage<br>CG2 : Acupuncture  | TMJD muscle group dysfunction (Class I, 129 cases)<br>joint structural disorders (Class II, 94 cases)<br>less organic damage (Class III, 17 cases) | IG: 80,<br>CG1: 80<br>CG2: 80 | ST7, ST6, LI4                  | NR, 10days                  | Effective rate            |                |
| 8   | Wu et al. (2002)    | RCT          | China (NR)              | Warm needling                             | Diclofenac sodium                                  | Temporomandibular Joint Disturbance Syndrome                                                                                                       | IG: 37<br>CG: 33              | ST7                            | daily/7days                 | Effective rate            |                |
| 9   | da silve (2012)     | RCT          | Brazil (NR)             | deep dry needling                         | needling + injection lidocaine hydrochloride 0.5%. | TMD index, RDC / TMD                                                                                                                               | 16                            | myofascial pain trigger points | One time                    | 1) PPT<br>2) VAS          |                |
| 10  | Liu (2019)          | RCT          | China (2015/09-2017/09) | Warm needling                             | diclofenac sodium sustained-release capsules       | Temporomandibular Joint Disturbance Syndrome (IG: 48±0, CG: 49±1)                                                                                  | IG: 33<br>CG: 32              | Ashipoint, LI4                 | 3 times a week / 4 weeks.   | 1)VAS<br>2)Friction index |                |

| No. | Study ID               | Study design | Country (period)         | Intervention (n)                      | Comparison (n)        | Disease of participants (Age : Mean±S.D)                                       | Number of Participants     | Acupoints                                          | Session or Treatment period                       | Relevant outcomes                                        | Adverse events |
|-----|------------------------|--------------|--------------------------|---------------------------------------|-----------------------|--------------------------------------------------------------------------------|----------------------------|----------------------------------------------------|---------------------------------------------------|----------------------------------------------------------|----------------|
| 11  | Dalewski et al. (2019) | RCT          | Poland (2016/07~2017/12) | Dry needling/ NSAIDs                  | Occlusal appliance    | Temporomandibular disorder—Chronic orofacial pain (IG: 31.3 IG: 31.2 CG: 28.7) | IG: 30<br>IG: 30<br>CG: 30 | Myofascial TrPs                                    | 3 times with 7–day intervals                      | 1) VAS<br>2) SPAQ(Sleep and Pain Activity Questionnaire) | NR             |
| 12  | Aksu et al. (2019)     | RCT          | Turkey (2013/03~2013/09) | Dry needling/ TrP inj.                | Exercise, PT          | Temporomandibular myofascial pain (IG+CG: 39.4±14.9)                           | IG: 20<br>IG: 22<br>CG: 21 | TrP in both masseter and lateral pterygoid muscles | 3 times with a weekly intervals                   | VAS                                                      | NR             |
| 13  | Uemoto et al. (2013)   | RCT          | Brazil (NR)              | Laser/ Dry needling in myofascial TrP | Placebo treatment TrP | Temporomandibular joint disorders(TMJD) (NR)                                   | IG: 7<br>IG: 7<br>CG: 7    | TrPs in right masseter muscle                      | 4 times with intervals ranging between 48 and 72h | VAS                                                      | NR             |

| No. | Study ID             | Study design | Country (period)         | Intervention (n)                                        | Comparison (n)                                         | Disease of participants (Age : Mean±S.D)                                           | Number of Participants     | Acupoints                 | Session or Treatment period                                 | Relevant outcomes                                                                                                                                                                      | Adverse events |
|-----|----------------------|--------------|--------------------------|---------------------------------------------------------|--------------------------------------------------------|------------------------------------------------------------------------------------|----------------------------|---------------------------|-------------------------------------------------------------|----------------------------------------------------------------------------------------------------------------------------------------------------------------------------------------|----------------|
| 14  | Eroglu et al. (2013) | RCT          | Turkey (2009/04~2009/07) | Dry needling/lidocaine inj./Oral flurbiprofen 200mg/day |                                                        | Myofascial pain syndrome<br>(IG: 33.75±8.10,<br>IG: 32.85±9.06,<br>IG: 34.55±8.30) | IG: 20<br>IG: 20<br>IG: 20 | all active trigger points | 3times (1st day, 3 <sup>rd</sup> day, 14 <sup>th</sup> day) | 1) VAS<br>2) Degree of tenderness at the trigger points by algometry<br>3) Active joint ROM of the neck and shoulders by goniometry<br>4) Quality of life by Nottingham Health Profile | NR             |
| 15  | Xue et al. (2007)    | RCT          | China(2004/06~2006/06)   | Warming needle moxibustion plus exercise                | Simple filiform needle needling/local blocking therapy | Temporomandibular joint dysfunction syndrome (NR)                                  | IG: 70<br>IG: 70<br>IG: 70 | LI4, ST7, TE17            | 10times                                                     | 邱蔚六, standard for orofacial surgery(total outcome according to symptoms, range of movement, etc.)                                                                                      |                |

| No. | Study ID           | Study design | Country (period)       | Intervention (n)   | Comparison (n)         | Disease of participants (Age : Mean±S.D)        | Number of Participants | Acupoints                | Session or Treatment period | Relevant outcomes                                                                                 | Adverse events |
|-----|--------------------|--------------|------------------------|--------------------|------------------------|-------------------------------------------------|------------------------|--------------------------|-----------------------------|---------------------------------------------------------------------------------------------------|----------------|
| 16  | Wang et al. (2009) | RCT          | China(2006/06~2007/08) | Electroacupuncture | partial closure method | Temporomandibular disorders (IG: 40.7 CG: 38.5) | IG: 48<br>CG: 48       | ST7, ST6, LI4, Ashipoint | 7times                      | 邱蔚六, standard for orofacial surgery(total outcome according to symptoms, range of movement, etc.) |                |

Eq. (E.3) [Q2-1] Distal Acupoints Group VS Local Acupoints Group VS Concurrent Treatment of Distal and Local Acupoints Group

| No. | Study ID    | Study design | Country (period) | Intervention (n)                          | Comparison (n)                                                                                                  | Disease of participants (Age : Mean±S.D)                                                                                               | Number of Participants          | Acupoints                        | Session or Treatment period                        | Relevant outcomes                                                                   | Adverse events                                       |
|-----|-------------|--------------|------------------|-------------------------------------------|-----------------------------------------------------------------------------------------------------------------|----------------------------------------------------------------------------------------------------------------------------------------|---------------------------------|----------------------------------|----------------------------------------------------|-------------------------------------------------------------------------------------|------------------------------------------------------|
| 1   | Kang (2012) | RCT          | Korea            | IG : Adjacent point treatment group (Trt) | CG1 : distant-point acupuncture (Con1),<br>CG2 : combined acupuncture of an adjacent and a distant point (Con2) | unilateral or bilateral TMD diagnosed following the Research Diagnostic Criteria and were required to have an AxisI, Group I diagnosis | IG : 12<br>CG1 : 12<br>CG2 : 14 | TE17, GB20, ST7, ST6, SI19, EX21 | six acupuncture sessions (twice a week for 3weeks) | 1) VAS<br>IG vs CG1 vs CG2<br>2) Muscle and TMJ palpation index<br>IG vs CG1 vs CG2 | IG : dental pain D/O<br>CG1 : gum and mouth pain D/O |

Eq. (E.4) [Q3] The Concurrent Treatment Group of Acupuncture and usual Conservative Treatment VS usual Conservative Treatment Group

| No. | Study ID               | Study design | Country (period)         | Intervention (n)                           | Comparison (n)        | Disease of participants (Age : Mean±S.D)                                       | Number of Participants     | Acupoints                                          | Session or Treatment period     | Relevant outcomes                                                                                 | Adverse events |
|-----|------------------------|--------------|--------------------------|--------------------------------------------|-----------------------|--------------------------------------------------------------------------------|----------------------------|----------------------------------------------------|---------------------------------|---------------------------------------------------------------------------------------------------|----------------|
| 1   | Dalewski et al. (2019) | RCT          | Poland (2016/07~2017/12) | Dry needling/ NSAIDs                       | Occlusal appliance    | Temporomandibular disorder—Chronic orofacial pain (IG: 31.3 IG: 31.2 CG: 28.7) | IG: 30<br>IG: 30<br>CG: 30 | Myofascial TrPs                                    | 3 times with 7-day intervals    | 1) VAS<br>2) SPAQ(Sleep and Pain Activity Questionnaire)                                          | NR             |
| 2   | Aksu et al. (2019)     | RCT          | Turkey (2013/03~2013/09) | Dry needling/ TrP inj.                     | Exercise, PT          | Temporomandibular myofascial pain (IG+CG: 39.4±14.9)                           | IG: 20<br>IG: 22<br>CG: 21 | TrP in both masseter and lateral pterygoid muscles | 3 times with a weekly intervals | VAS                                                                                               | NR             |
| 3   | Wang et al. (2009)     | RCT          | China (2013/05~)         | Acupuncture combined with magnetic therapy | only magnetic therapy | Temple-jaw joint dysfunction (IG: 30.48±11.2 CG: 31.5±12.1)                    | IG: 52<br>CG: 30           | ST7, ST6, LI4                                      | 10 times everyday               | 邱蔚六, standard for orofacial surgery(total outcome according to symptoms, range of movement, etc.) | NR             |

| No. | Study ID         | Study design | Country (period)        | Intervention (n)                           | Comparison (n)      | Disease of participants (Age : Mean±S.D) | Number of Participants | Acupoints                                                            | Session or Treatment period          | Relevant outcomes                                                                                 | Adverse events |
|-----|------------------|--------------|-------------------------|--------------------------------------------|---------------------|------------------------------------------|------------------------|----------------------------------------------------------------------|--------------------------------------|---------------------------------------------------------------------------------------------------|----------------|
| 4   | Ye et al. (2019) | RCT          | China (2018/01~2018/10) | Very High Frequency and Electroacupuncture | Very High Frequency | TMD (IG: 44.05±12.40 CG: 42.05±10.88)    | IG: 20 CG: 20          | SI19, ST7, ST6, LI4, ST36 + 先天不足, 肝腎虛者 KI3, BL18 配合 (實證은 瀉法, 虛證은 補法) | 10 times in 2 weeks (5 times a week) | 1) VAS<br>2) OR(range of motion)                                                                  | NR             |
| 5   | Hu et al. (2018) | RCT          | China(2013/09~2016/03)  | Very High Frequency and Electroacupuncture | Very High Frequency | TMD (NR)                                 | IG: 35 CG: 34          | SI19, TE17, ST7, ST6, Ashipoint, LI4, GB34, LR3, ST36                | 7 times everyday                     | 邱蔚六, standard for orofacial surgery(total outcome according to symptoms, range of movement, etc.) | NR             |



Eq. (E.5) [Q4] Laser Therapy Group VS Inactive Control Group

| No. | Study ID                | Study design | Country (period) | Intervention (n)         | Comparison (n)                   | Disease of participants (Age : Mean±S.D)              | Number of Participants                 | Acupoints                                  | Session or Treatment period              | Relevant outcomes   |
|-----|-------------------------|--------------|------------------|--------------------------|----------------------------------|-------------------------------------------------------|----------------------------------------|--------------------------------------------|------------------------------------------|---------------------|
| 1   | Ferreira et al. (2013)  | RCT          | Brazil (NR)      | Laser acupuncture + NMOS | Placebo laser + NMOS             | Chronic myofascial pain and arthralgia (34.17±8.83)   | IG: 20<br>CG: 20                       | ST6, I19, B20, LI4, LR3, TE3, GB34, EX-HN3 | Once a week for 3 months                 | VAS                 |
| 2   | Katsoulis et al. (2010) | RCT          | Switzerland (NR) | Laser needle acupuncture | Placebo laser needle acupuncture | tendomyopathy of the masticatory musculature (33, NR) | IG(open): 4<br>IG(blinded): 3<br>CG: 4 | ST6, SI18, SI3, LI4                        | two 15 min sessions per week for 3 weeks | VAS<br>Verbal scale |

Eq. (E.6) [Q5] Pharmacopuncture Group VS usual Conservative Treatment Group

| No. | Study ID          | Study design | Country (period) | Intervention (n)                          | Comparison (n)          | Disease of participants (Age : Mean±S.D) | Number of Participants | Acupoints                                      | Session or Treatment period               | Relevant outcomes | Adverse events |
|-----|-------------------|--------------|------------------|-------------------------------------------|-------------------------|------------------------------------------|------------------------|------------------------------------------------|-------------------------------------------|-------------------|----------------|
| 1   | Kim et al. (2020) | RCT          | Korea (NR)       | Hominis placental pharmacopuncture (n=41) | Physical therapy (n=41) | Chronic TMD (NR)                         | IG: 41<br>CG: 41       | SI19, GB20, GB21, TE17, ST7, ST6, LI18, EX-HN5 | 10 times (twice in a week during 5 weeks) | 1) VAS<br>2) NRS  | NR             |

Eq. (E.7) [Q6] Chuna Manipulation Group VS usual Conservative Treatment Group

| No. | Study ID           | Study design   | Intervention (n)                                                                                                       | Comparison (n)                                                             | Duration                        | F/U                                                                                    | Outcome measurements                           | Results                                           | Adverse events                                                                                                            |
|-----|--------------------|----------------|------------------------------------------------------------------------------------------------------------------------|----------------------------------------------------------------------------|---------------------------------|----------------------------------------------------------------------------------------|------------------------------------------------|---------------------------------------------------|---------------------------------------------------------------------------------------------------------------------------|
| 1   | Kim et al. (2019)  | RCT (protocol) | Chuna manual therapy                                                                                                   | Usual care (UC) [thermotherapy, ultrasound therapy, TENS, ICT, etc.]       | 8 sessions for 4 weeks          | 1st, 3rd, 5th, and 7th treatment visits (week 1-4) and 5 weeks, 3 months, and 6 months | VAS, NRS, ROM, BDI, JFLS, PGIC, SF-12, EQ5D-5L | —                                                 | Total 6 events (추나군: 3, Usual care:3)<br>추나군: 두통, 이명, 구강점막 부종<br>Usual care: 귀통증, 목통증, 턱관절 통증 심화호소                        |
| 2   | Chen et al. (2012) | RCT            | TMT (acupoint massage)                                                                                                 | Western medication (Meloxicam Tablets and Composite Chlorzoxazone Tablets) | 1 session per a day for 2 weeks | 2 weeks                                                                                | 1) Effective rate<br>2) ROM<br>3) VAS          | 1) ER: P<0.05<br>2) ROM: P<0.05<br>3) VAS: P<0.01 | Digestive symptoms such as nausea, loss of appetite, upper abdominal discomfort, and stomach pain in the comparison group |
| 3   | Su et al. (2014)   | RCT            | TMT (pushing technique on Ashi point, SJ-22, ST-7, GB-3, ST-6 for 5 minutes. Pinching technique on LI-4 for 1 minute.) | Ultrashort wave therapy                                                    | 3 sessions per week for 2 weeks | 2 weeks                                                                                | ROM                                            | ROM: P>0.05                                       | NR                                                                                                                        |
| 4   | Su et al. (2013)   | RCT            | TMT (pushing and point-and-click)                                                                                      | Ultrashort wave therapy                                                    | 3 sessions per week for 2 weeks | 2 weeks                                                                                | VAS                                            | VAS: P<0.05                                       | A small number of patients in the treatment group                                                                         |

|   |                  |     |                                                                                        |                     |                                                                                          |                             |                                                                            |                                                                                                                    |                                                                                                                                       |
|---|------------------|-----|----------------------------------------------------------------------------------------|---------------------|------------------------------------------------------------------------------------------|-----------------------------|----------------------------------------------------------------------------|--------------------------------------------------------------------------------------------------------------------|---------------------------------------------------------------------------------------------------------------------------------------|
|   |                  |     | k technique on Ashi point, SJ-22, ST-7, GB-3, ST-6. Grasping technique on LI-4, SJ-5.) |                     |                                                                                          |                             |                                                                            |                                                                                                                    | experienced local swelling, skin redness and other symptoms. The symptoms disappeared after adjusting the intensity of the technique. |
| 5 | Gu et al. (2015) | RCT | TMT                                                                                    | semiconductor laser | Each treatment is about 20 minutes, every other day, 6 sessions as a course of treatment | Immediately after treatment | 1) ER<br>2) Friction's Craniomandibular Index<br>DI<br>PI<br>CMI<br>3) ROM | 1) ER: P<0.05<br>2) Friction's Craniomandibular Index<br>DI: P<0.05<br>PI: P<0.05<br>CMI: P<0.05<br>3) ROM: P<0.05 | Not reported                                                                                                                          |

CMI: Craniomandibular index, NR: Not reported, RCT: Randomized controlled trial, MD: Mean difference, RR: Relative risk, CMT: Chuna manual therapy, TMT: Tuina manual therapy, UC: Usual care, VAS: Visual Analogue Scale, NRS: Numeric Rating Scale, ROM: Range of Motion, BDI: Beck's Depression Inventory, JFLS: Jaw Functional Limitation Scale, PGIC: Patient Global Impression of Change, SF-12: Short Form-12 Health Survey, EQ-5D-5L: 5-Level EuroQol-5 Dimension, ER: Effective rate, FPSC: Facial Pain Score Scale, DI: Dysfunction index, PI: palpation index, TDP: Te Ding Dian Zi Bo Pu,

Eq. (E.8) [Q7] The Concurrent Treatment Group of Chuna Manipulation and usual Conservative Treatment VS the usual Conservative Treatment Group

| No. | Study ID         | Study design | Intervention (n)          | Comparison (n)      | Duration                                              | F/U                         | Outcome measurements | Results       | Adverse events |
|-----|------------------|--------------|---------------------------|---------------------|-------------------------------------------------------|-----------------------------|----------------------|---------------|----------------|
| 1   | Gu et al. (2015) | RCT          | TMT + TDP                 | TDP                 | daily for 10 days, 5 days interval, daily for 10 days | Immediately after treatment | 1) ER                | 1) ER: P<0.05 | NR             |
| 2   | Li et al. (2008) | RCT          | TMT + Very High Frequency | Very High Frequency | 1 session per a day for 10 days                       | Immediately after treatment | 1) ER                | 1) ER: P<0.05 | NR             |

CMI: Craniomandibular index, NR: Not reported, RCT: Randomized controlled trial, MD: Mean difference, RR: Relative risk, CMT: Chuna manual therapy, TMT: Tuina manual therapy, UC: Usual care, VAS: Visual Analogue Scale, NRS: Numeric Rating Scale, ROM: Range of Motion, BDI: Beck's Depression Inventory, JFLS: Jaw Functional Limitation Scale, PGIC: Patient Global Impression of Change, SF-12: Short Form-12 Health Survey, EQ-5D-5L: 5-Level EuroQol-5 Dimension, ER: Effective rate, FPSC: Facial Pain Score Scale, DI: Dysfunction index, PI: palpation index, TDP: Te Ding Dian Zi Bo Pu,

Eq. (E.9) [Q8] Concurrent Treatment Group of Chuna Manipulation and Korean Medicine Treatment VS Acupuncture or Herbal Medicine Treatment Group

| No. | Study ID           | Study design | Intervention (n)                      | Comparison (n)                             | Duration                                                                                | F/U                         | Outcome measurements                                                                                 | Results                                                                                                                      | Adverse events |
|-----|--------------------|--------------|---------------------------------------|--------------------------------------------|-----------------------------------------------------------------------------------------|-----------------------------|------------------------------------------------------------------------------------------------------|------------------------------------------------------------------------------------------------------------------------------|----------------|
| 1   | Ding et al. (2015) | RCT          | TMT + Acupuncture with moxibustion    | Acupuncture with moxibustion               | 20 sessions for 20 days                                                                 | Immediately after treatment | 1) ER<br>2) VAS                                                                                      | 1) ER: P<0.05<br>2) VAS: P<0.05                                                                                              | Not reported   |
| 2   | Liu et al. (2013)  | RCT          | TMT + Herbal medicine                 | 1) Herbal medicine<br>2) TMT               | 1) TID for 2 weeks<br>2) 1 session per a day for 2 weeks                                | 1 week and 2 weeks          | 1) ER                                                                                                | 1) ER<br>1 week: Not reported<br>2 weeks: Not reported                                                                       | Not reported   |
| 3   | Wan et al. (2014)  | RCT          | TMT + Acupuncture                     | 1) Acupuncture<br>2) injection on acupoint | 1 session per a day for 10 days                                                         | Immediately after treatment | 1) ER                                                                                                | 1) ER: P<0.05                                                                                                                | Not reported   |
| 4   | Bu et al. (2011)   | RCT          | TMT + electroacupuncture              | electroacupuncture                         | 1 session a day, 10 sessions as a course of treatment, 2 days apart, 4 courses in total | Immediately after treatment | 1) ER<br>2) effectiveness for myofacial pain<br>3) effectiveness for external pterygoid muscle spasm | 1) ER: P<0.05<br>2) effectiveness for myofacial pain: P<0.05<br>3) effectiveness for external pterygoid muscle spasm: P<0.05 | Not reported   |
| 5   | Jin et al. (2011)  | RCT          | CMT + Acupuncture<br>Pharmacopuncture | Acupuncture<br>Pharmacopuncture            | 2 sessions a week for 4 weeks                                                           | Immediately after treatment | 1) VAS<br>2) FPSC                                                                                    | 1) VAS: P<0.05<br>2) FPSC: P<0.05                                                                                            | Not reported   |

CMI: Craniomandibular index, NR: Not reported, RCT: Randomized controlled trial, MD: Mean difference, RR: Relative risk, CMT: Chuna manual therapy, TMT: Tuina manual therapy, UC: Usual care, VAS: Visual Analogue Scale, NRS: Numeric Rating Scale, ROM: Range of Motion, BDI: Beck's Depression Inventory, JFLS: Jaw Functional Limitation Scale, PGIC: Patient Global Impression of Change, SF-12: Short Form-12 Health Survey,

---

EQ-5D-5L: 5-Level EuroQol-5 Dimension, ER: Effective rate, FPSC: Facial Pain Score Scale, DI: Dysfunction index, PI: palpation index, TDP: Te Ding Dian Zi Bo Pu,

---

Eq. (E.10) [Q9] Herbal Medicine Treatment Group VS usual Conservative Treatment Group

| No. | Study ID         | Study design | Intervention (n) | Comparison (n)                                                                 | Duration                                     | F/U      | Outcome measurements | Results       | Adverse events |
|-----|------------------|--------------|------------------|--------------------------------------------------------------------------------|----------------------------------------------|----------|----------------------|---------------|----------------|
| 1   | Hu et al. (2017) | RCT          | Herbal medicine  | medicine (Mesulide dispersible tablets BID, Sodium hyaluronate injection Q.WK) | 2 weeks for a course, 6 course for treatment | 12 weeks | 1) ER                | 1) ER: P<0.05 | Not reported   |

CMI: Craniomandibular index, NR: Not reported, RCT: Randomized controlled trial, MD: Mean difference, RR: Relative risk, CMT: Chuna manual therapy, TMT: Tuina manual therapy, UC: Usual care, VAS: Visual Analogue Scale, NRS: Numeric Rating Scale, ROM: Range of Motion, BDI: Beck's Depression Inventory, JFLS: Jaw Functional Limitation Scale, PGIC: Patient Global Impression of Change, SF-12: Short Form-12 Health Survey, EQ-5D-5L: 5-Level EuroQol-5 Dimension, ER: Effective rate, FPSC: Facial Pain Score Scale, DI: Dysfunction index, PI: palpation index, TDP: Te Ding Dian Zi Bo Pu



Eq. (E.11) [Q10] Concurrent Treatment Group of Herbal Medicine Treatment and usual Conservative Treatment VS usual Conservative Treatment

| No. | Study ID          | Study design | Intervention (n)                                                                 | Comparison (n)                                                                                                                     | Duration                                                         | F/U                         | Outcome measurements                                                     | Results                                                                                                   | Adverse events |
|-----|-------------------|--------------|----------------------------------------------------------------------------------|------------------------------------------------------------------------------------------------------------------------------------|------------------------------------------------------------------|-----------------------------|--------------------------------------------------------------------------|-----------------------------------------------------------------------------------------------------------|----------------|
| 1   | Yan et al. (2015) | RCT          | Herbal medicine TID + Very High Frequency QD (Western ultrashort wave treatment) | Very High Frequency QD (Western ultrashort wave treatment)                                                                         | Herbal medicine for 7~14 days Very High Frequency QD for 10 days | Immediately after treatment | 1) ER                                                                    | 1) ER: P<0.05                                                                                             | Not reported   |
| 2   | Li et al. (2018)  | RCT          | Herbal medicine BID + local injection therapy                                    | local injection therapy (Lidocaine hydrochloride 2 ml, triamcinolone acetonide 20 mg, vitamin b12 0.5~1mg and normal saline BI.WK) | 4 weeks                                                          | 4 weeks                     | 1) ER<br>2) VAS<br>3) ROM<br>4) serum IL-6, IFN- $\gamma$ , IL-1 $\beta$ | 1) ER: P<0.05<br>2) VAS: P<0.05<br>3) ROM: P<0.05<br>4) serum IL-6, IFN- $\gamma$ , IL-1 $\beta$ : P<0.05 | Not reported   |

CMI: Craniomandibular index, NR: Not reported, RCT: Randomized controlled trial, MD: Mean difference, RR: Relative risk, CMT: Chuna manual therapy, TMT: Tuina manual therapy, UC: Usual care, VAS: Visual Analogue Scale, NRS: Numeric Rating Scale, ROM: Range of Motion, BDI: Beck's Depression Inventory, JFLS: Jaw Functional Limitation Scale, PGIC: Patient Global Impression of Change, SF-12: Short Form-12 Health Survey, EQ-5D-5L: 5-Level EuroQol-5 Dimension, ER: Effective rate, FPSC: Facial Pain Score Scale, DI: Dysfunction index, PI: palpation index, TDP: Te Ding Dian Zi Bo Pu,

Group

Eq. (E.12) [Q11] Concurrent Treatment Group of Herbal Medicine Treatment with Korean medicine Treatment VS Korean Medicine Treatment

| No. | Study ID           | Study design | Intervention (n)                        | Comparison (n)        | Duration     | F/U          | Outcome measurements                                                              | Results                                                                                                                                                             | Adverse events |
|-----|--------------------|--------------|-----------------------------------------|-----------------------|--------------|--------------|-----------------------------------------------------------------------------------|---------------------------------------------------------------------------------------------------------------------------------------------------------------------|----------------|
| 1   | Yang et al. (2016) | RCT          | Herbal medicine TID + Acupuncture       | Acupuncture           | Not reported | Not reported | 1) ER<br>2) Scale score<br>① Subjective outcome<br>② Subjective outcome<br>3) VAS | 1) ER: P<0.05<br>2) Scale score<br>①주관지표:<br>그룹간<br>비교 없음<br>(그룹내<br>치료 전후<br>비교만<br>있음)<br>②객관지표:<br>그룹간<br>비교 없음<br>(그룹내<br>치료 전후<br>비교만<br>있음)<br>3) VAS: P<0.05 | Not reported   |
| 2   | Hao et al. (2012)  | RCT          | Herbal medicine + Acupuncture, Laser QD | Acupuncture, Laser QD | 20 days      | 20 days      | 1) ER                                                                             | 1) ER: No between-group comparison (Intervention: 85.71%, Comparison: 76.00%)                                                                                       | Not reported   |

CMI: Craniomandibular index, NR: Not reported, RCT: Randomized controlled trial, MD: Mean difference, RR: Relative risk, CMT: Chuna manual therapy, TMT: Tuina manual therapy, UC: Usual care, VAS: Visual Analogue Scale, NRS: Numeric Rating Scale, ROM: Range of Motion, BDI: Beck's Depression Inventory, JFLS: Jaw Functional Limitation Scale, PGIC: Patient Global Impression of Change, SF-12: Short Form-12 Health Survey, EQ-5D-5L: 5-Level EuroQoL-5 Dimension, ER: Effective rate, FPSC: Facial Pain Score Scale, DI: Dysfunction index, PI: palpation index, TDP: Te Ding Dian Zi Bo Pu,

Eq. (E.13) [Q12] Exercise Treatment Group VS Inactive Control Group

| No. | Study ID              | Study design | Intervention (n)                      | Comparison (n)                    | Duration | F/U             | Outcome measurements                                                                                                                                        | Results                                                                                                                                                                       | Adverse events                   |
|-----|-----------------------|--------------|---------------------------------------|-----------------------------------|----------|-----------------|-------------------------------------------------------------------------------------------------------------------------------------------------------------|-------------------------------------------------------------------------------------------------------------------------------------------------------------------------------|----------------------------------|
| 1   | Yoda et al. (2003)    | RCT          | Exercise of TMJ                       | no treatment                      | 3 months | After treatment | 1) Success rate<br>2) Disk position                                                                                                                         | 1) Intervention group: 61.9% improved.<br>Comparison group: 0% improved (p=0.0001)<br>2) 23.1% improved                                                                       | Not reported                     |
| 2   | Yoshida et al. (2011) | RCT          | Exercise of TMJ                       | no treatment                      | NR       | NR              | 1) Maximum mouth opening<br>2) Lateral movement compared with the opposite side<br>3) Lateral movement to affected side<br>4) protrusion<br>4) Success rate | There was a significant difference between the experimental (50/74, 68%) and control groups (3/74, 4%) in the degree of increased mouth-opening.                              | Not reported                     |
| 3   | Bae et al. (2013)     | RCT          | Exercise of TMJ (relaxation exercise) | no treatment                      | 4 weeks  | After treatment | 1) ROM<br>2) Deviation<br>3) Occlusion<br>4) Pain                                                                                                           | ROM, deviation and pain showed statistically significant improvements after the intervention in the active exercise and relaxation exercise for the masticator muscle groups. | Not reported                     |
| 4   | Barbosa et al. (2019) | RCT          | masticatory muscles focused           | placebo (simulated laser therapy) | 4 weeks  | 8 weeks         | 1) VAS<br>2) Efficiency<br>3) Time until                                                                                                                    | Pain scores decreased for both groups, but the                                                                                                                                | No adverse effects were reported |

|   |                   |     |                                 |                                    |         |         |                                                                |                                                                                              |              |
|---|-------------------|-----|---------------------------------|------------------------------------|---------|---------|----------------------------------------------------------------|----------------------------------------------------------------------------------------------|--------------|
|   |                   |     | endurance exercises             |                                    |         |         | fatigue                                                        | intervention group showed lower values at 8 weeks.                                           |              |
| 5 | Lee et al. (2019) | RCT | Cervical Stabilization Exercise | placebo (simulated electrode pads) | 4 weeks | 6 weeks | 1) Therabite range of motion scale<br>2) Maximum mouth opening | The upper cervical stabilization group showed more significant effect than the control group | Not reported |

CMI: Craniomandibular index, NR: Not reported, RCT: Randomized controlled trial, MD: Mean difference, RR: Relative risk, CMT: Chuna manual therapy, TMT: Tuina manual therapy, UC: Usual care, VAS: Visual Analogue Scale, NRS: Numeric Rating Scale, ROM: Range of Motion, BDI: Beck's Depression Inventory, JFLS: Jaw Functional Limitation Scale, PGIC: Patient Global Impression of Change, SF-12: Short Form-12 Health Survey, EQ-5D-5L: 5-Level EuroQol-5 Dimension, ER: Effective rate, FPSC: Facial Pain Score Scale, DI: Dysfunction index, PI: palpation index, TDP: Te Ding Dian Zi Bo Pu

Eq. (E.14) [Q15] LLLT VS Inactive Control Group

| Study                   | Country (period) | Intervention s                                                             | Comparison                                                      | Disease of participants (Age : Mean $\pm$ S.D) | Number of Participants            | Treatment area                                                                                                                                 | Session or Treatment period                         | Relevant outcomes                 |
|-------------------------|------------------|----------------------------------------------------------------------------|-----------------------------------------------------------------|------------------------------------------------|-----------------------------------|------------------------------------------------------------------------------------------------------------------------------------------------|-----------------------------------------------------|-----------------------------------|
| Amanat et al.(2013)     | Iran             | LLLT(980nm, 3000Hz and 12.73J/cm <sup>2</sup>                              | sham laser                                                      | orofacial pain                                 | IG: 30<br>CG: 30                  | Trigger point<br>Foci along the line of pain<br>(In the absence of a trigger point)                                                            | 10 sessions (3 sessions per week)                   | VAS                               |
| Demirkol et al.(2015)   | Turkey           | LLLT(1064nm, 8 j/cm <sup>2</sup> , 0.25W, 20s)                             | Occlusal splint/ placebo                                        | TMD characterized with myofacial pain          | IG: 10<br>CG: 20<br>(or 10:10:10) | Muscle trigger point                                                                                                                           | 5 times per week, for a total of 10 sessions        | VAS                               |
| Cavalcanti et al.(2016) | Brazil           | LLLT(780nm, 35.0 J/cm <sup>2</sup> , 70mW, 20s)                            | PDP therapy/ Placebo therapy                                    | Pain associated with TMD                       | IG: 20<br>CG: 40<br>(or 20:20:20) | (intraoral) pterygoid medial, (extraoral) intra-headset, pre-headset, gonion, anterior superior insertion of masseter                          | every other day, except weekends, for four weeks    | P(Presence) or A(Absence) of pain |
| Costa et al.(2017)      | Brazil           | PBMT(Phtobiomodulation therapy)(830 nm, 100mW, 100 J/cm <sup>2</sup> 28s)  | placebo                                                         | myalgia treatment of masticatory muscles       | IG: 30<br>CG: 30                  | bilaterally to specific points on the masseter and temporal muscles                                                                            | in a single day                                     | VAS                               |
| Decarli et al.(2012)    | Brazil           | LLLT(830nm, 100nW, 100 Jcm <sup>2</sup> , 28s) <u>and</u> <u>piroxicam</u> | active laser and placebo piroxicam/ placebo laser and piroxicam | temporomandibular joint arthralgia             | IG: 11<br>CG: 21<br>(or 11:11:10) | 10 temporomandibular joint and muscle points on each side (joint capsule (lateral, posterior, superior, anterior, inferior), masseter (origin, | four sessions (each session is twice a week, over a | VAS                               |

| Study                    | Country (period) | Intervention s                                                                                                            | Comparison      | Disease of participants (Age : Mean±S.D)                                    | Number of Participants                                                                      | Treatment area                                                                          | Session or Treatment period          | Relevant outcomes                              |
|--------------------------|------------------|---------------------------------------------------------------------------------------------------------------------------|-----------------|-----------------------------------------------------------------------------|---------------------------------------------------------------------------------------------|-----------------------------------------------------------------------------------------|--------------------------------------|------------------------------------------------|
|                          |                  |                                                                                                                           |                 |                                                                             |                                                                                             | insertion) and temporal (anterior, middle, posterior).)                                 | 10-day period,                       |                                                |
| Devecchio et al. (2019)  | Italy            | LLLT(808nm, 5 J/min, 250mW)                                                                                               | sham laser      | mono or bilateral TMJD                                                      | IG: 30<br>CG: 60<br>(or Study Group: Placebo Group: Drug Group = 30:30:30)                  | pain area                                                                               | 1 week, twice daily                  | VAS                                            |
| Fornaini et al. (2015)   | Italy            | LLLT(808nm, 250mW, 35 J/cm <sup>2</sup> , 15 min)                                                                         | inactive laser  | mono- or bi-lateral TMD                                                     | IG: 12<br>CG: 12                                                                            | irradiation of the cutaneous zone corresponding to the TMJ each side                    | once a day for 2 weeks               | VAS                                            |
| Herpich et al.(2017)     | Brazil           | phototherapy with a combination of super-pulsed laser (905 nm), red (640 nm), and infrared (875 nm) light emitting diodes | Placebo         | asseter and temporal muscles in women with temporomandibular disorder(TMD). | Group 1 - 2.62 J;<br>Group 2 - 5.24 J;<br>Group 3 - 7.86 J; placebo group. (15: 15: 15: 15) | masseter (three points) and temporal (two points) muscles bilaterally                   | (한번 쓰고 24시간 마다 사후관찰 한 듯)             | VAS, EMG                                       |
| Leadegodo y et al.(2017) | Brazil           | LLLT(780nm, 50mW, 25 J/cm <sup>2</sup> , 20s)                                                                             | Sham laser      | with chronic temporomandibular disorders (TMDs)                             | IG: 9<br>CG: 7                                                                              | masseter & anterior temporal muscle                                                     | 12 sessions                          | RMS(Root Mean Square), EMG                     |
| Machado et al.(2016)     | Brazil           | LLLT(780nm, 60mW, 60±1.0 J/cm <sup>2</sup> ,                                                                              | No intervention | with chronic temporomandibular disorders(TMDs)                              | GI: 21<br>GII: 21<br>GIII: 19                                                               | five sites in the TMJ region: lateral pole; superior, anterior, posterior, and inferior | The treatment sessions lasted for 45 | Orofacial Myofunctional Evaluation with Scores |

| Study              | Country (period) | Intervention s                                                                                                                          | Comparison | Disease of participants (Age : Mean±S.D)          | Number of Participants                   | Treatment area                                                                                                                                                                                                            | Session or Treatment period                                                                                                                                                  | Relevant outcomes |
|--------------------|------------------|-----------------------------------------------------------------------------------------------------------------------------------------|------------|---------------------------------------------------|------------------------------------------|---------------------------------------------------------------------------------------------------------------------------------------------------------------------------------------------------------------------------|------------------------------------------------------------------------------------------------------------------------------------------------------------------------------|-------------------|
|                    |                  | 40s)groups:<br>GI (LLLT + O M exercises),<br>GII (orofacial myofunctional therapyOMT<br>GIII (LLLT placebo +OMexercise s)<br>GIV (LLLT) |            |                                                   | GIV: 18<br>GC: 20                        | points of the condylar position;<br>and on the painful sites of the masseter and temporal muscles reported by the subjects                                                                                                | min and were held on a weekly basis during the first 60 days and on a biweekly basis thereafter for a total of 12 sessions, totaling a maximum of 9 h in the 120-day period. | (OMES) Protocol   |
| Magri et al.(2019) | Brazil           | LLLT(780nm) ·masseter and anterior temporal = 5 J/cm2 (20 mW - 10 s) ·TMJ area = 7.5 J/cm2 (30 mW - 10 s)                               | placebo    | with painful TMD (31.7 ±5.2 years)                | IG: 20<br>CG: 21                         | the masseter (three points: upper, middle, and lower), the anterior temporalis (three points: upper, middle, and lower), and the temporomandibular joint (TMJ) region (four points forming a cross and one central point) | two sessions per week for four consecutive weeks, totaling eight sessions.                                                                                                   | VAS               |
| Magri et al.(2017) | Brazil           | LLLT(780 nm; masseter and anterior temporal = 5 J/cm2, 20 mW, 10 s; TMJ area = 7.5 J/cm2,                                               | placebo    | with temporomandibular disorders (TMD) frequently | laser: 31<br>placebo: 30<br>controls: 30 | the masseter (three points: upper, middle, and lower), the anterior temporal (three points: upper, middle, and lower), and the TMJ region (four points forming a cross and one central point)                             | twice a week, eight sessions                                                                                                                                                 | VAS               |

| Study                     | Country (period) | Intervention s                                                                                                                                                           | Comparison | Disease of participants (Age : Mean±S.D)                                 | Number of Participants                               | Treatment area                                                                                                                                                                                                        | Session or Treatment period | Relevant outcomes |
|---------------------------|------------------|--------------------------------------------------------------------------------------------------------------------------------------------------------------------------|------------|--------------------------------------------------------------------------|------------------------------------------------------|-----------------------------------------------------------------------------------------------------------------------------------------------------------------------------------------------------------------------|-----------------------------|-------------------|
|                           |                  | 30 mW, 10 s                                                                                                                                                              |            |                                                                          |                                                      |                                                                                                                                                                                                                       |                             |                   |
| Nadershah et al.(2019)    | India            | Photobiomodulation therapy(940nm, 7W, 300J, 2min; 24s per application point)                                                                                             | sham laser | with unilateral TMJ and masticatory muscles pain during function         | IG: 108<br>CG: 94                                    | 2 cm distance from the skin to 5 points at the temporal (center of Temporalis muscle), zygomatic (origin of Masseter muscle), angle of the mandible (insertion of Masseter muscle), pre-auricular, and mastoid areas. | every 48 h for 10 days      | VAS               |
| Abreuvenacio et al.(2005) | Brazil           | LILT(low intensity laser therapy) (780nm, 30mW, 10s 6.3 J/cm2)                                                                                                           | placebo    | presenting temporomandibular joint (TMJ) pain and mandibular dysfunction | IG:15<br>CG: 15                                      | three points in each TMJ                                                                                                                                                                                              | six sessions                | VAS               |
| Venezian et al.(2005)     | Brazil           | Diode laser(780nm)<br>Group I-dose of 25 J/cm2 (50mW for 20 seconds, <i>actual treatment</i> );<br>Group II-dose of 25 J/cm2 (50mW for 20 seconds, <i>placebotreat</i> ) | placebo    | with myofascial pain (41.58)                                             | The four groups had 12 components each (12:12:12:12) | temporalis and masseter muscles                                                                                                                                                                                       | twice a week (four weeks)   | VAS               |



| Study                | Country (period) | Intervention s                                                                                                                                     | Comparison | Disease of participants (Age : Mean±S.D)                    | Number of Participants                                                                                                                                                                                                                                                                              | Treatment area                                                                   | Session or Treatment period                                  | Relevant outcomes |
|----------------------|------------------|----------------------------------------------------------------------------------------------------------------------------------------------------|------------|-------------------------------------------------------------|-----------------------------------------------------------------------------------------------------------------------------------------------------------------------------------------------------------------------------------------------------------------------------------------------------|----------------------------------------------------------------------------------|--------------------------------------------------------------|-------------------|
|                      |                  | ment);<br>Group III-dose of 60 J/cm2 (60mW for 40 seconds, actual treatment) and Group IV-dose of 60 J/cm2 (60mW for 40 seconds placebo treatment) |            |                                                             |                                                                                                                                                                                                                                                                                                     |                                                                                  |                                                              |                   |
| Yamaner et al.(2020) | Turkey           | LLLT(820 nm, 3 J/cm2, 300 mW, 10s)                                                                                                                 | sham laser | TMD with disc displacement with reduction(DDR) 31.51 ±10.32 | IG: 33<br>CG: 29<br>randomized in a 1:1 ratio into one of two groups:<br>(1) treatment or (2) placebo. Then, 40 TMJs in the reatment group were randomized in a 1:1 ratio into one of two subgroups:<br>(1)laser or (2) ozone, and 40 TMJs in the placebo group were randomized in a 1:1 ratio into | predetermined TMJ points(anterior aspect, posterior aspect, and joint interface) | three times per week for 10 min, for a total of six sessions | VAS               |

| Study                 | Country (period) | Intervention s                                                                                        | Comparison | Disease of participants (Age : Mean±S.D)                              | Number of Participants                                  | Treatment area                                                                                                                                                                   | Session or Treatment period                       | Relevant outcomes                                                   |
|-----------------------|------------------|-------------------------------------------------------------------------------------------------------|------------|-----------------------------------------------------------------------|---------------------------------------------------------|----------------------------------------------------------------------------------------------------------------------------------------------------------------------------------|---------------------------------------------------|---------------------------------------------------------------------|
|                       |                  |                                                                                                       |            |                                                                       | one of two subgroups: (1) sham laser or (2) sham ozone. |                                                                                                                                                                                  |                                                   |                                                                     |
| Ahrai et al.(2014)    | Iran             | LLLT(average power 50 mW, peak power 80 W, 1,500 Hz, 120 s, 6 J, and 3.4 J/cm <sup>2</sup> per point) | placebo    | 20 female patients with myogenic TMD(mean age of 35.5 years.)         | IG: 10<br>CG: 10                                        | masseter muscle; anterior, middle, and posterior portions of the body of the temporalis muscle; and insertion of the internal pterygoid muscle                                   | three times a week for 4 weeks                    | VAS                                                                 |
| Cetiner et al.(2006)  | Turkey           | Class IIIb laser product (wavelength, 830 nm; duration, 162 sec; dosage, 7 J/cm <sup>2</sup>          | placebo    | myogenic originated TMD(Age : 31.7 years)                             | IG : 24<br>CG : 15                                      | joint capsule (lateral, posterior, superior), masseter (anterior, inferior, deep), temporal (anterior, deep, middle, origin), medial, and lateral pyterigoid muscles bilaterally | 10 sessions daily for 2 weeks, excluding weekends | VAS, Number of tender points, Maximum mouth opening, lateral motion |
| da Cunha et al.(2008) | Brazil           | LLLT(830nm, 500mW, 20s, 4J/point))                                                                    | placebo    | who presented for diagnosis and treatment of TMD                      | IG : 20<br>CG : 20                                      | painful area                                                                                                                                                                     | once a week for four consecutive weeks            | VAS, Craniomandibular Index                                         |
| da Silva et al.(2012) | Brazil           | G-I: 780 nm, 70 mW, IA-TMD submitted                                                                  | placebo    | presenting signs and symptoms associated with TMD for over six months | IG : 30<br>CG : 15<br>(15 : 15 : 15)                    | anterior, superior, posterior, posteroinferior points of the condylar                                                                                                            | two weekly sessions during five weeks,            | VAS                                                                 |

| Study                    | Country (period) | Interventions                                                             | Comparison | Disease of participants (Age : Mean±S.D)             | Number of Participants | Treatment area                                                                                                                        | Session or Treatment period               | Relevant outcomes                                                                                           |
|--------------------------|------------------|---------------------------------------------------------------------------|------------|------------------------------------------------------|------------------------|---------------------------------------------------------------------------------------------------------------------------------------|-------------------------------------------|-------------------------------------------------------------------------------------------------------------|
|                          |                  | to an energy dose of 52.5 J/cm2; G-II: 780 nm, 70 mW, dose of 105.0 J/cm2 |            | (Age : 39.7 years)                                   |                        | position, and in the external auditory meatus, three points on the masseter muscles, and one point on the anterior temporalis muscles | totaling 10 applications                  |                                                                                                             |
| emshoff et al.(2008)     | Austria          | LLLT (Helium Neon, 632.8 nm, 30 mW, 1.5 J/cm2)                            | sham LLLT  | unilateral TMJ pain (Age : 42.9 years)               | IG : 26<br>CG : 26     | the skin at the center of the upper joint space, approximately 1 cm in front of the tragus                                            | 2 to 3 treatments per week for 8 weeks    | VAS                                                                                                         |
| kulekcioglu et al.(2003) | Turkey           | LLLT(904nm, 17mW, 1000 Hz, duration: 180 seconds, dosage: 3 J/cm2)        | placebo    | arthrogenic and myogenic TMD (Age : 37.0±12.3 years) | IG : 20<br>CG : 15     | four most tender points selected during examination                                                                                   | fifteen sessions                          | VAS, TMJ MRI, Number of tender points, Number of joint sounds, Active/Passive mouth opening, lateral motion |
| Lasemi et al.(2008)      | Iran             | LLLT (980 nm, 80 Hz, 6 J) at three points over the TMJ (ie, 2 J           | placebo    | TMD                                                  | IG : 24<br>CG : 24     | (1) the posterior aspect of the joint with the mouth open to treat the posterior articular branches of the                            | 2 treatment sessions with a 48-h interval | VAS                                                                                                         |

| Study               | Country (period) | Intervention s                                                                                                                                                                  | Comparison          | Disease of participants (Age : Mean±S.D)                                                      | Number of Participants               | Treatment area                                                                                                                                                                                                                                | Session or Treatment period  | Relevant outcomes |
|---------------------|------------------|---------------------------------------------------------------------------------------------------------------------------------------------------------------------------------|---------------------|-----------------------------------------------------------------------------------------------|--------------------------------------|-----------------------------------------------------------------------------------------------------------------------------------------------------------------------------------------------------------------------------------------------|------------------------------|-------------------|
|                     |                  | per point and 1.5 J at the other sites of muscle pain)                                                                                                                          |                     |                                                                                               |                                      | auriculotemporal nerve<br>(2) an area anterior to condyle in the sigmoid notch with the mouth closed for the area of insertion of the lateral pterygoid muscle into the condylar neck and meniscus<br>(3) the joint interface with mouth open |                              |                   |
| Marini et al.(2010) | Italy            | SLLLT(frequency range 1 to 50 kHz, wave length 910 nm, mean power 400mW, and peak power 45W.<br>1. 20 kHz for 10 minutes<br>2. 18 kHz for 5 minutes<br>3. 16 kHz for 5 minutes) | ibuprofen / placebo | TMJ DD without reduction and osteoarthritis, pain for more than 6 months of similar intensity | IG : 39<br>CG : 60<br>(39 : 30 : 30) | TMJ areas (정확하게 안적혀 있음)                                                                                                                                                                                                                       | 10 consecutive days (5 d/wk) | VAS               |

| Study                 | Country (period) | Intervention s                                                                                                            | Comparison | Disease of participants (Age : Mean±S.D)                                                                                        | Number of Participants               | Treatment area                                                                                                                                                                                                                                                                                                                             | Session or Treatment period                      | Relevant outcomes                                                                                  |
|-----------------------|------------------|---------------------------------------------------------------------------------------------------------------------------|------------|---------------------------------------------------------------------------------------------------------------------------------|--------------------------------------|--------------------------------------------------------------------------------------------------------------------------------------------------------------------------------------------------------------------------------------------------------------------------------------------------------------------------------------------|--------------------------------------------------|----------------------------------------------------------------------------------------------------|
| Sancakli et al.(2015) | Turkey           | LLLT (820nm, 300mW, 3J/cm <sup>2</sup> )                                                                                  | placebo    | diagnosis of myofascial pain according to the Research Diagnostic Criteria for Temporomandibular Disorder (RDC/TMD)(Age : 39.2) | IG : 20<br>CG : 10<br>(10 : 10 : 10) | Group I : precisely and continuously to the greatest points of pain in the related muscle (masseter and/or temporalis)<br><br>Group II : three predetermined points on the masseter muscle (superior [MS], middle [MM], and inferior [MI] points) and three points on the temporalis muscle (anterior [TA], middle, and posterior points). | three times per week, for a total of 12 sessions | VAS, muscle palpations, PPTs(kg/cm <sup>2</sup> ) on the masticatory muscles, Mandibular movements |
| sattayut et al.(2012) | United kingdom   | LILT(Group I : 820nm, 21.4J/cm <sup>2</sup> , 4J/point, 60mW / Group II : 820nm, 107J/cm <sup>2</sup> , 20J/point, 300mW) | placebo    | unilateral myogenous TMD(Age : 35)                                                                                              | IG : 20<br>CG : 10<br>(10 : 10 : 10) | auriculotemporal nerve at the posterior aspect of the TMJ, trigger point on the masseter muscle                                                                                                                                                                                                                                            | three times per week                             | pain pressure threshold                                                                            |
| shirani et al.(2008)  | Iran             | LLLT(probe I : 660 nm, 17.3 mW, 6.2J/cm <sup>2</sup> , 0Hz / probe II : 890nm, 9.8W, 1J/cm <sup>2</sup> , 1500Hz)         | placebo    | diagnosis of MPDS(age : 23.8 years)                                                                                             | IG : 12<br>CG : 4<br>(4 : 4 : 4 : 4) | medial and lateral pterygoid muscles                                                                                                                                                                                                                                                                                                       | twice a week for 3 weeks                         | VAS                                                                                                |

| Study                      | Country (period) | Intervention s                                                                                                | Comparison | Disease of participants (Age : Mean±S.D)                                                                                 | Number of Participants                              | Treatment area                                                                                                                                                                                         | Session or Treatment period                    | Relevant outcomes                |
|----------------------------|------------------|---------------------------------------------------------------------------------------------------------------|------------|--------------------------------------------------------------------------------------------------------------------------|-----------------------------------------------------|--------------------------------------------------------------------------------------------------------------------------------------------------------------------------------------------------------|------------------------------------------------|----------------------------------|
|                            |                  | Group I : probe I + II<br>Group II : probe I<br>Group III : prboe II                                          |            |                                                                                                                          |                                                     |                                                                                                                                                                                                        |                                                |                                  |
| Wang Xiaodong et al.(2011) | China            | LLLT (50Hz, 300mW, 650nm/830nm)                                                                               | placebo    | TMD                                                                                                                      | IG : 21<br>CG : 21                                  | 측면, 후면, 상부 관절낭                                                                                                                                                                                         | once a day for 6 consecutive days              | VAS                              |
| Carraso et al,(2009)       | Brazil           | LILT(Group I : 780nm, 50mW, 25 J/cm2 / Group II : 780nm, 60mW, 60 J/cm2 / Group III : 780nm, 70mW, 105 J/cm2) | placebo    | MPS(myofascial pain syndrome) and having one active trigger point in the anterior masseter and anterior temporal muscles | IG : 30<br>CG : 30<br>(10 : 10 : 10 : 10 : 10 : 10) | trigger point                                                                                                                                                                                          | twice a week, for four weeks                   | VAS                              |
| Carrasco et al.(2008)      | Brazil           | LILT(780 nm, 70 mw, 60s, 105J/cm2)                                                                            | placebo    | TMD                                                                                                                      | IG : 7<br>CG : 7                                    | five points of the temporomandibular joint (TMJ) area: lateral point (LP), superior point (SP), anterior point (AP), posterior point (PP), and posterior-inferior point (PIP) of the condylar position | twice per week, for a total of eight sessions. | VAS, colorimetric capsule method |
| Conti et al.(1997)         | Brazil           | LLLT(100 rn W, 4J)                                                                                            | placebo    | TMD                                                                                                                      | IG : 10<br>CG : 10                                  | For the arthrogenous group, the probe was                                                                                                                                                              | once a week for three                          | VAS                              |

| Study                       | Country (period) | Intervention s                                                             | Comparison            | Disease of participants (Age : Mean±S.D) | Number of Participants               | Treatment area                                                                                                                                                                                                       | Session or Treatment period                          | Relevant outcomes                                                                     |
|-----------------------------|------------------|----------------------------------------------------------------------------|-----------------------|------------------------------------------|--------------------------------------|----------------------------------------------------------------------------------------------------------------------------------------------------------------------------------------------------------------------|------------------------------------------------------|---------------------------------------------------------------------------------------|
|                             |                  |                                                                            |                       |                                          | (5 : 5 : 5 : 5)                      | placed over the lateral joint surface close at a degree angle to allow optimum joint penetration. For the myogenous group, the probe was applied over the most painful muscle spot, detected during muscle palpation | consecutive weeks                                    |                                                                                       |
| Fikackova et al.(2007)      | Czech            | LLLT(Group I : 400mW, 830nm, 10 J/cm2 / Group II : 400mW, 830nm, 15 J/cm2) | sham laser(0.1 J/cm2) | TMD (Age : 41 years)                     | IG : 61<br>CG : 19<br>(33 : 28 : 19) | In front of the tragus, the meatus acusticus externus(when the mouth was open), 2 cm in front of the tragus, under the zygomatic arch(when the mouth was closed)                                                     | 10 sessions within 1 month                           | two possible categories (successful and unsuccessful) for use in statistical analysis |
| de Moraes Maia et al.(2014) | Brazil           | LLLT(808nm, 100mW, 70 J/cm2)                                               | placebo               | myofascial pain                          | IG : 12<br>CG : 9                    | trigger points of the anterior temporal and masseter muscles                                                                                                                                                         | two times per week for 4 weeks                       | masticatory performance, pressure pain threshold, VAS                                 |
| madani et al.(2014)         | Iran             | LLLT(50mW, 1500Hz, 3.4 J/cm2)                                              | placebo               | TMJ osteoarthritis                       | IG : 10<br>CG : 10                   | posterior, anterior, and superior of the mandibular condyles, and inside the external auditory duct) origin, body, and insertion of the masseter muscle; anterior, middle, and posterior                             | three times a week for 4 weeks, totaling 12 sessions | VAS                                                                                   |

| Study                 | Country (period) | Intervention s                  | Comparison | Disease of participants (Age : Mean±S.D) | Number of Participants | Treatment area                                                                             | Session or Treatment period  | Relevant outcomes |
|-----------------------|------------------|---------------------------------|------------|------------------------------------------|------------------------|--------------------------------------------------------------------------------------------|------------------------------|-------------------|
|                       |                  |                                 |            |                                          |                        | parts of the body of the temporalis muscle; and insertion of the internal pterygoid muscle |                              |                   |
| mazzetto et al.(2007) | Brazil           | LILT(780 nm, 70 mW, 89.7 J/cm2) | placebo    | TMD                                      | IG : 24<br>CG : 24     | external auditive duct toward the retrodiskal region, on both sides                        | twice a week for four weeks  | VAS               |
| Mazzetto et al.(2010) | Brazil           | LLLT(830 nm, 40 mW, 5J/cm2)     | placebo    | TMD                                      | IG : 20<br>CG : 20     | condyle lateral pole: superior, anterior, posterior, and posterior-inferior                | twice a week during 4 weeks  | VAS               |
| Frare et al.(2008)    | Brazil           | LLLT(904 nm, 15mW, 6 J/cm2)     | placebo    | TMD                                      | IG : 10<br>CG : 10     | pre-auricular region and external auditory meatus                                          | twice a week, for four weeks | VAS               |



Eq. (E.15) [Q15] TENS VS Inactive Control Group

| Study                 | Country (period) | Interventions | Comparison | Disease of participants (Age : Mean±S.D)  | Number of Participants | Treatment area                                  | Session or Treatment period | Relevant outcomes                                            |
|-----------------------|------------------|---------------|------------|-------------------------------------------|------------------------|-------------------------------------------------|-----------------------------|--------------------------------------------------------------|
| Ferreira et al.(2016) | Brazil           | TENS          | Sham TENS  | TMD<br>(IG: 25.10±3.87<br>CG: 24.15±3.01) | IG: 15<br>CG: 15       | Masseter muscles and anterior temporalis muscle | 1 time                      | VAS, pain threshold                                          |
| Seifi et al. (2017)   | Iran             | TENS          | Sham TENS  | TMD                                       | IG: 10<br>CG: 10       | Below the earhole, back of the neck             | 4 times                     | VAS, Maximum Mouth-Opening, Tenderness of Masticatory Muscle |

Eq. (E.16) [Q16] TENS VS Conservative Therapy

| Study                  | Country (period) | Interventions                                         | Comparison           | Disease of participants (Age : Mean±S.D) | Number of Participants | Treatment area                                             | Session or Treatment period | Relevant outcomes |
|------------------------|------------------|-------------------------------------------------------|----------------------|------------------------------------------|------------------------|------------------------------------------------------------|-----------------------------|-------------------|
| Kruger et al. (1998)   | South Africa     | TENS+conservative therapy (ibuprofen, biteplate, etc) | Conservative therapy | Myofacial pain dysfunction (38.5±14.65)  | IG: 5<br>CG: 5         | Trigger point areas in the masseter and temporalis muscles | 14 weeks                    | Pain score        |
| Shanavas et al. (2014) | India            | TENS with medication                                  | Medication           | TMD (only range reported)                | IG: 20<br>CG: 20       | NR                                                         | 5 days                      | VAS               |

Eq. (E.17) [Q17] Concurrent Treatment Group of Korean Physical Therapy and usual Conservative Treatment VS the usual Conservative Treatment Group

| No. | Study ID                 | Study design | Country (period) | Intervention (n) | Comparison (n) | Disease of participants (Age : Mean±S.D)                | Number of Participants | Session or Treatment period     | Relevant outcomes                   | Results                                                               | Adverse events    |
|-----|--------------------------|--------------|------------------|------------------|----------------|---------------------------------------------------------|------------------------|---------------------------------|-------------------------------------|-----------------------------------------------------------------------|-------------------|
| 1   | Ritenbaugh et al. (2008) | RCT          | USA (2001–2003)  | TCM              | Usual care     | Temporomandibular disorders (IG: 40.1±8.5 CG: 40.5±9.4) | IG: 50<br>CG: 60       | 2 times with a week for 6 weeks | 1) Pain<br>2) Impact on social life | TCM provided significantly greater decreases in average pain than SC. | No serious events |
